# Supplementary material for: HSF-1 promotes longevity through ubiquilin-1 dependent mitochondrial network remodelling
Source: Research Square preprint supplement (doi:10.21203/rs.3.rs-3481052/v1), 2023-11-03
Supplement: Supplementary file 1 [file b6c9a28b7f293d6ef1d4f238.docx]

The mass spectrometry proteomics data have been deposited to the ProteomeXchange Consortium via the PRIDE partner repository with the dataset identifier PXD044595. These data can be accessed using the login details:

Username: reviewer_pxd044595@ebi.ac.uk

Password: UpW33ozw

RNASeq - Raw and unprocessed data sets can be obtained through the Gene Expression Omnibus using accession number: GSE241558. No login is required.
